# Supplementary material for: Association of Duration of Smoking Cessation or Cumulative Smoking Amount with Serum hs-CRP Level in Korean Adults: A Nationwide Population-Based Cross-Sectional Study
Source: MDPI journal article supplement (doi:10.3390/toxics10090533), 2022-09-10
Supplement: s1 [file s1]

**Supplementary table S1. Unadjusted and adjusted odds ratios and 95% confidence intervals of covariates for the elevated serum hs-CRP level\* in Korean adults from KNHANES 2016 to 2018.**

| Variables                                    | Adjusted OR<br>(95% CI) | P value |
|----------------------------------------------|-------------------------|---------|
| Age (year)                                   | 1.01 (1.00 – 1.02)      | 0.231   |
| Sex                                          |                         | 0.009   |
| Male                                         | 1.27 (1.06 – 1.51)      |         |
| Female (reference)                           | 1                       |         |
| Income                                       |                         | 0.155   |
| Q1 lowest                                    | 1.29 (1.02 – 1.64)      |         |
| Q2 mid-low                                   | 1.09 (0.87 – 1.36)      |         |
| Q3 mid-high                                  | 1.02 (0.81 – 1.28)      |         |
| Q4 highest (reference)                       | 1                       |         |
| Education                                    |                         | 0.452   |
| Middle school graduation or under            | 0.92 (0.73 – 1.15)      |         |
| High school graduation or higher (reference) | 1                       |         |
| Marital status                               |                         | 0.616   |
| Unmarried (reference)                        | 1                       |         |
| Married                                      | 0.84 (0.60 – 1.19)      |         |
| Divorced or widowed                          | 0.84 (0.55 – 1.30)      |         |
| Alcohol intake                               |                         | 0.071   |
| Non drinker (reference)                      | 0.86 (0.73 – 1.01)      |         |
| Current drinker                              | 1                       |         |
| Physical activity                            |                         | 0.203   |
| No                                           | 1.11 (0.95 – 1.30)      |         |
| Yes (reference)                              | 1                       |         |
| Obesity†                                     |                         | <0.001  |
| Yes                                          | 1.90 (1.61 – 2.23)      |         |
| No (reference)                               | 1                       |         |
| Systolic blood pressure (mmHg)               | 1.006 (1.001 – 1.011 )  | 0.031   |
| Fasting blood glucose (mg/dL)                | 1.007 (1.004 – 1.010)   | <0.001  |
| Serum total cholesterol (mg/dL)              | 1.005 (1.003 – 1.007)   | <0.001  |

hs-CRP, high-sensitivity C-reactive protein; KNHANES, Korea National Health and Nutrition Examination Survey; OR, odds ratio; CI, confidence interval.

\*Defined as a serum hs-CRP level above 1.0 mg/L.

†Defined as body mass index  $\geq 25$  kg/m<sup>2</sup>

Adjusted for age (continuous variable), sex, income, educational level, marital status, alcohol intake, physical activity, obesity, systolic blood pressure (continuous variable), fasting blood glucose (continuous variable), and serum total cholesterol (continuous variable).
